# Supplementary material for: LiGdxY1−xF4 and LiGdF4:Eu3+ Microparticles as Potential Materials for Optical Temperature Sensing
Source: MDPI journal article supplement (doi:10.3390/ceramics7010018), 2024-02-23
Supplement: s1 [file s1]

# SUPPLEMENTARY INFORMATION

## **LiGd<sub>x</sub>Y<sub>1-x</sub>F<sub>4</sub> and Eu<sup>3+</sup>:LiGdF<sub>4</sub> microparticles as potential materials for optical temperature sensing**

\*Oleynikova E.I.<sup>1</sup>, Morozov, O.A.<sup>1,2</sup>, Korableva, S.L.<sup>1</sup>, and \*\*Pudovkin M.S.<sup>1</sup>

Corresponding authors:

Pudovkin M.S. Email: jaz7778@list.ru

Oleynikova E.I. Email: kate15-05@mail.ru

<sup>1</sup>*Kazan Federal University, 18 Kremlyovskaya str, Kazan, 420008, Russian Federation*

<sup>2</sup>*Zavoisky Physical-Technical Institute, FRC Kazan Scientific Center of RAS, Sibirsky Trakt str. 10, Kazan, 420029, Russian Federation*

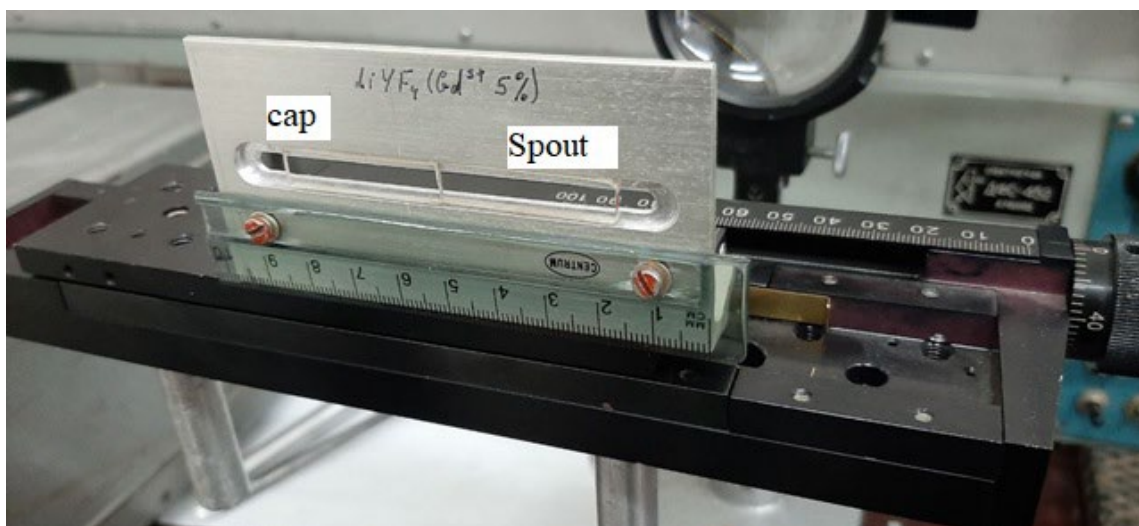

Figure S1. The photo of the Gd<sup>3+</sup> (5 at.%):LiYF<sub>4</sub> sample for the determination of the distribution coefficient

Table S1. Lattice parameters of

$\text{LiGd}_x\text{Y}_{1-x}\text{F}_4$

$x=0.05$   $a=5.174$  Å  $c=10.76$  Å

$x=0.3$   $a=5.192$  Å  $c=10.84$  Å

$x=0.7$   $a=5.219$  Å  $c=10.92$  Å

$x=1$   $a=5.233$  Å  $c=10.99$  Å

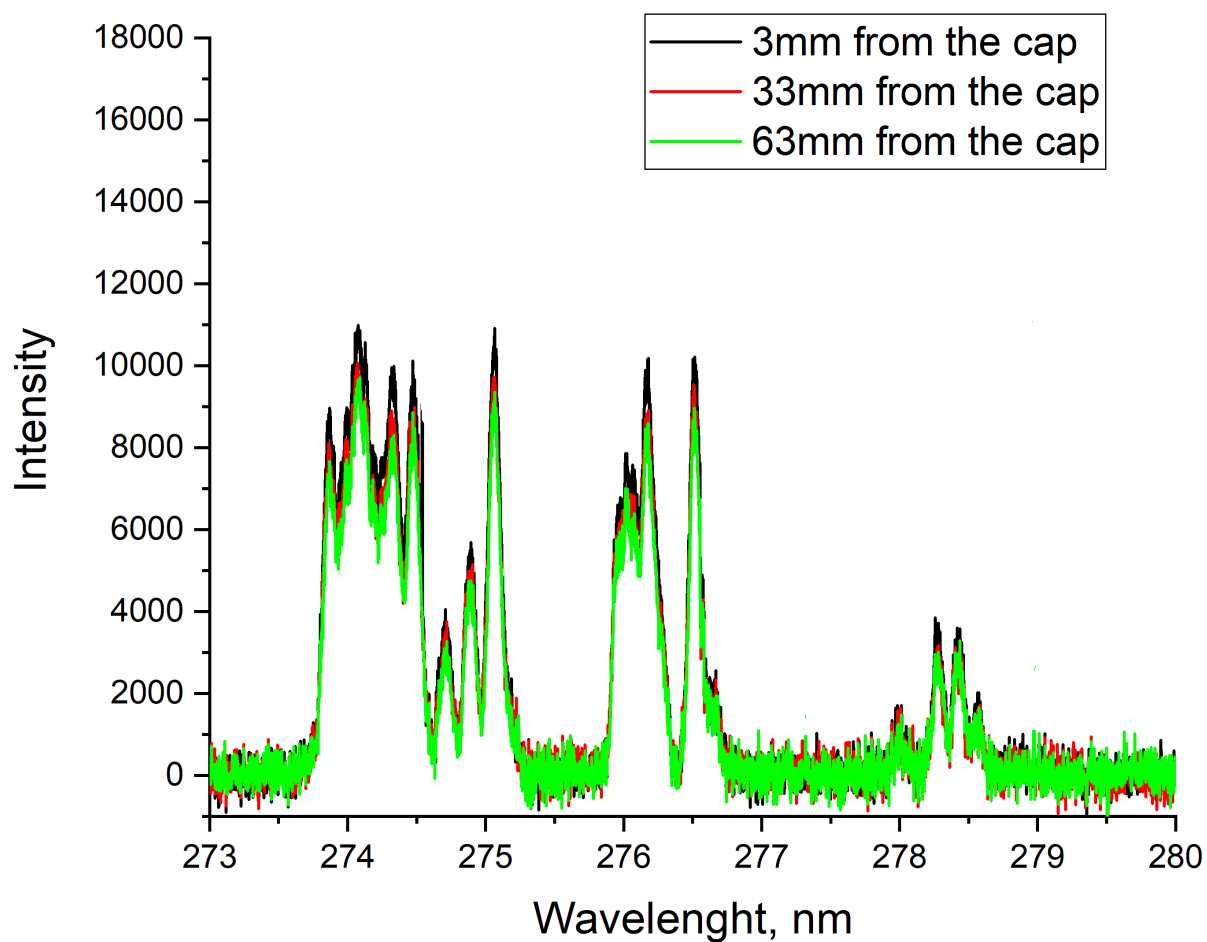

**Figure S2.** Absorption spectra of the  $\text{LiGd}_x\text{Y}_{1-x}\text{F}_4$  sample ( $x=0.05$ ) at different distances from the crystal cap

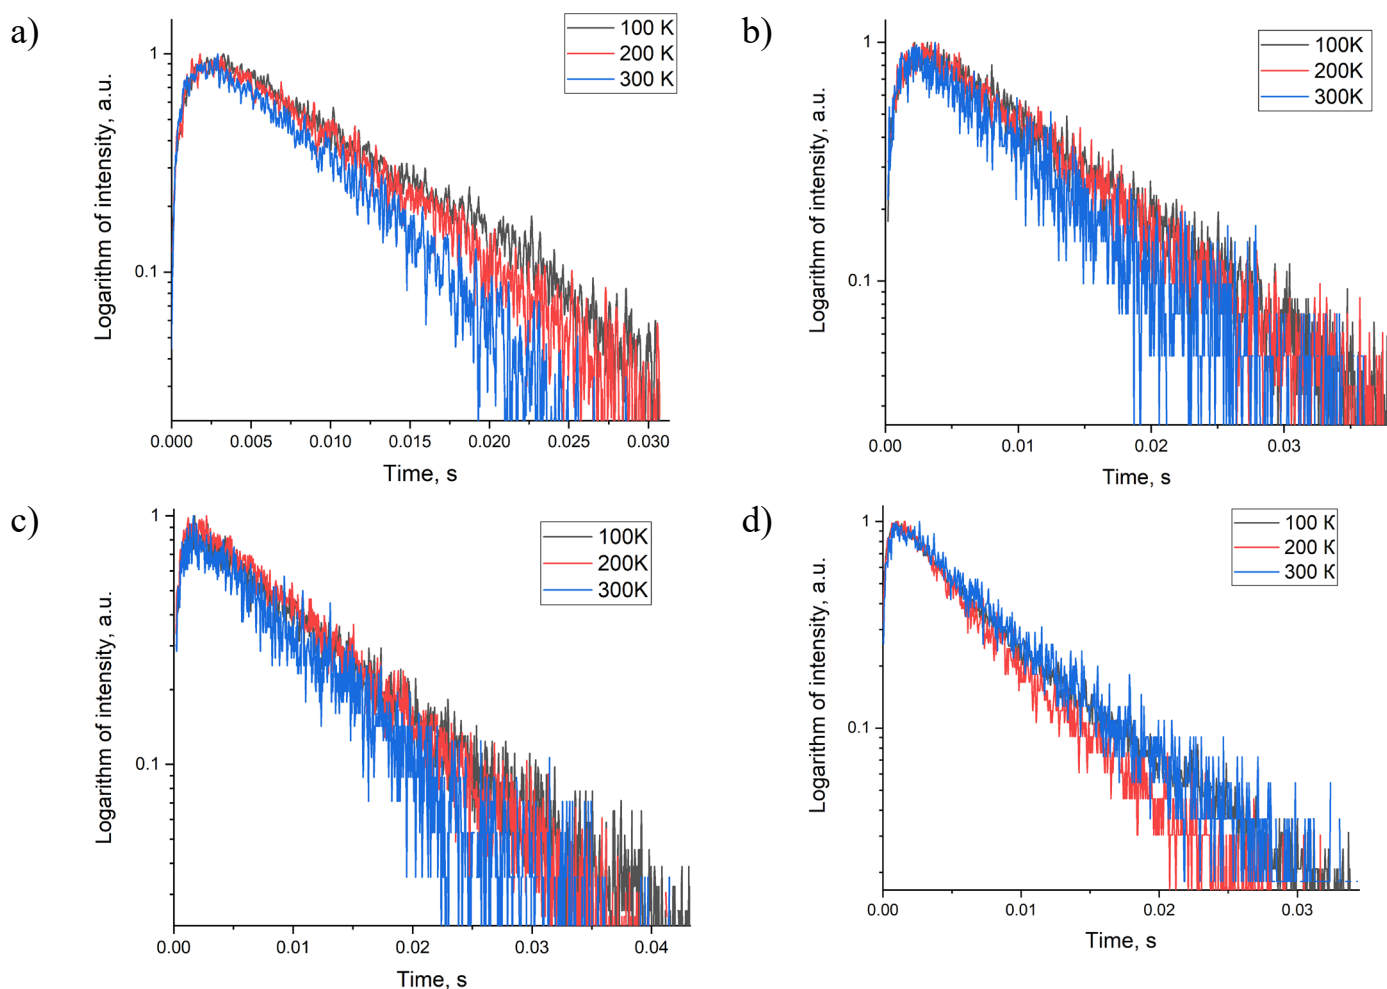

Figure S3. Kinetics of luminescence of: a)  $\text{LiGd}_x\text{Y}_{1-x}\text{F}_4$  ( $x=0.05$ ), b)  $\text{LiGd}_x\text{Y}_{1-x}\text{F}_4$  ( $x=0.3$ ), c)  $\text{LiGd}_x\text{Y}_{1-x}\text{F}_4$  ( $x=0.7$ ) and d)  $\text{LiGd}_x\text{Y}_{1-x}\text{F}_4$  ( $x=1.0$ ) at the 312 nm wavelength ( $^6\text{P}_{7/2}$ - $^8\text{S}_{7/2}$ ) at a temperature 100 K (black), 200 K (red), 300 K (blue)

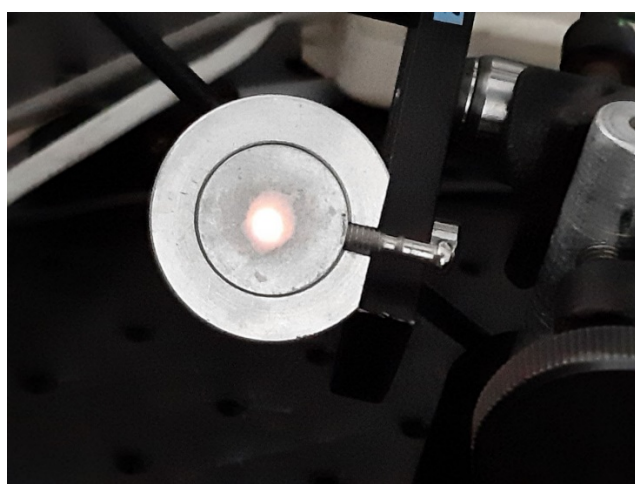

(a)

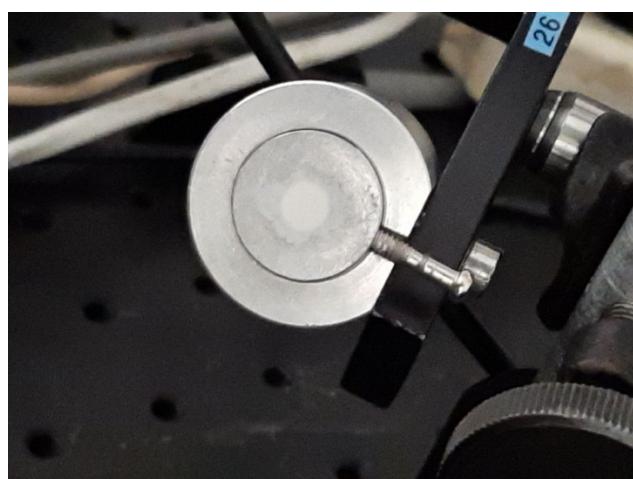

(b)

Figure S4. The pictures of both  $\text{LiGdF}_4:\text{Eu}^{3+}$  (0.1 %) (a) and  $\text{LiYF}_4:\text{Eu}^{3+}$  (0.1 %) (b) under 274 nm excitation. For the  $\text{LiGdF}_4:\text{Eu}^{3+}$  (0.1 %), the characteristic red luminescence of  $\text{Eu}^{3+}$  is clearly observed. The  $\text{LiYF}_4:\text{Eu}^{3+}$  (0.1 %) does not show this emission

### The $\text{Eu}^{3+}:\text{LiYF}_4$ growth procedure:

Powders of LiF (99.999% purity, Lanhit, Russia),  $\text{YF}_3$  (99.999% purity, Lanhit, Russia),  $\text{EuF}_3$  (99.999% purity, Lanhit, Russia) fluorides were used as initial materials. The  $\text{YF}_3$  and  $\text{EuF}_3$  components were previously dried for 5 h at  $100^\circ\text{C}$  in vacuum. Crystal growth process was carried out in a vacuum ( $\sim 10^{-5}$ – $10^{-6}$  mbar) in a graphite crucible on a seed. The crystals were grown from the melt by vertical technique of Bridgman–Stockbarger. The temperature gradient at the solid-liquid interface was in the  $85$ – $100^\circ\text{C}/\text{cm}$  range.

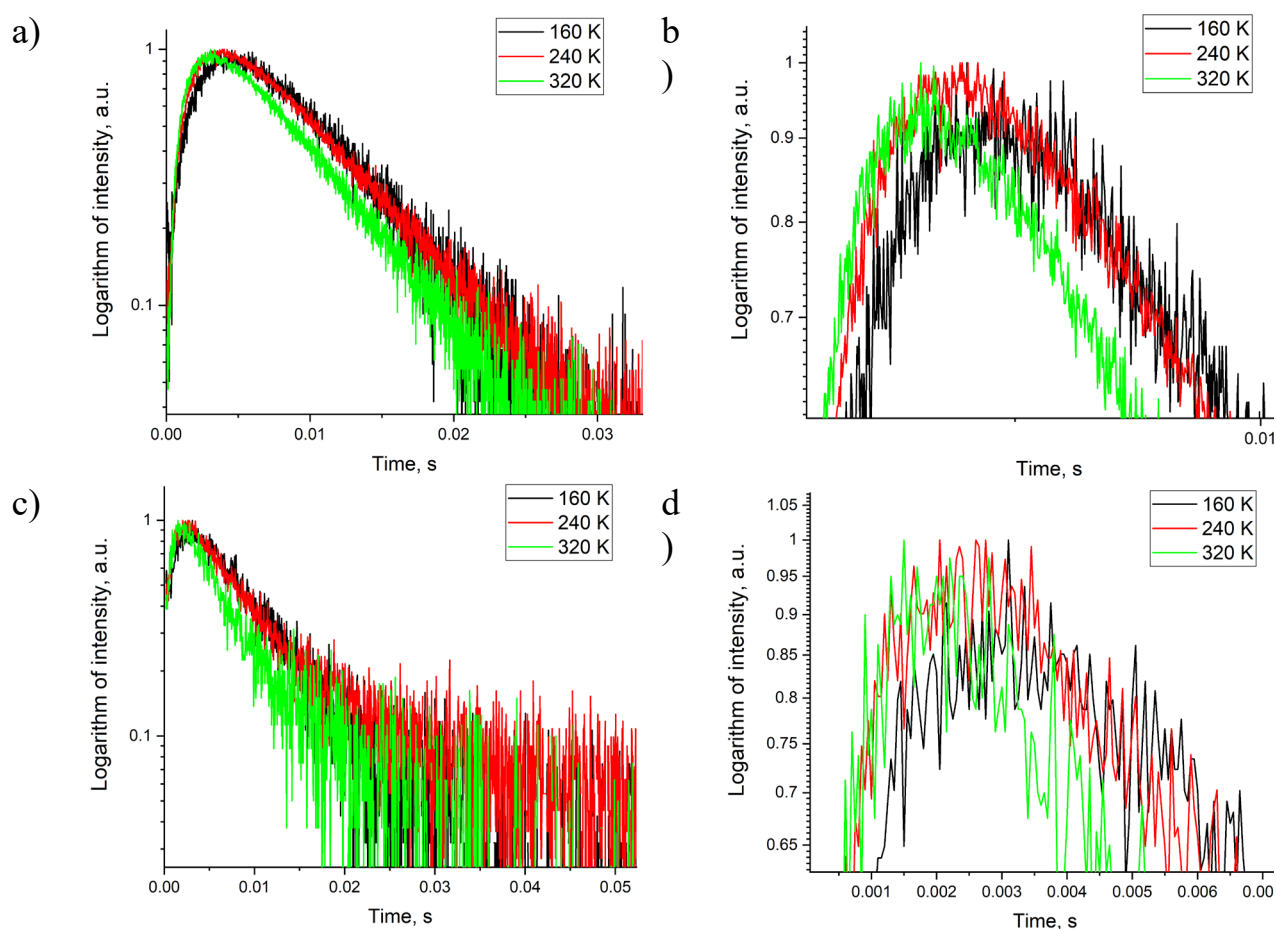

Figure S5. Kinetics of luminescence of  $\text{LiGdF}_4:\text{Eu}^{3+}$  (1 at.%) in the different wavelength: a) kinetics of luminescence decay in the 610.7nm, b) kinetics of luminescence rise in the 610.7nm, c) kinetics of luminescence decay in the 620.8nm and d) kinetics of luminescence rise in the 620.8 nm at a temperature 160 K (black), 240 K (red), 320 K (green)
